# Supplementary material for: Highly Stable Docetaxel-Loaded Nanoparticles Based on Poly(D,L-lactide)-b-Poly(ethylene glycol) for Cancer Treatment: Preparation, Characterization, and In Vitro Cytotoxicity Studies
Source: MDPI journal article supplement (doi:10.3390/polym15102296), 2023-05-13
Supplement: s1 [file s1]

# Highly Stable Docetaxel-Loaded Nanoparticles Based on Poly(D,L-lactide)-*b*-Poly(ethylene glycol) for Cancer Treatment: Preparation, Characterization, and In Vitro Cytotoxicity Studies

Ekaterina V. Kuznetsova <sup>1,\*</sup>, Nikita G. Sedush <sup>1,2</sup>, Yulia A. Puchkova <sup>1</sup>, Sergei V. Aleshin <sup>1</sup>, Evgeny V. Yastremsky <sup>3</sup>, Alexey A. Nazarov <sup>4</sup> and Sergei N. Chvalun <sup>1,2</sup>

<sup>1</sup> National Research Center "Kurchatov Institute", Moscow 123182, Russia; nsedush@gmail.com (N.G.S.); yellow\_jk@mail.ru (Y.A.P.); neos.1991@gmail.com (S.V.A.); s-chvalun@yandex.ru (S.N.C.)

<sup>2</sup> Enikolopov Institute of Synthetic Polymeric Materials, Russian Academy of Sciences, Moscow 117393, Russia

<sup>3</sup> Shubnikov Institute of Crystallography, Federal Science Research Center "Crystallography and Photonics", Russian Academy of Science, Moscow 119333, Russia

<sup>4</sup> Department of Chemistry, Lomonosov Moscow State University, Moscow 119991, Russia

\* Correspondence: kuznetsova.kate992@gmail.com

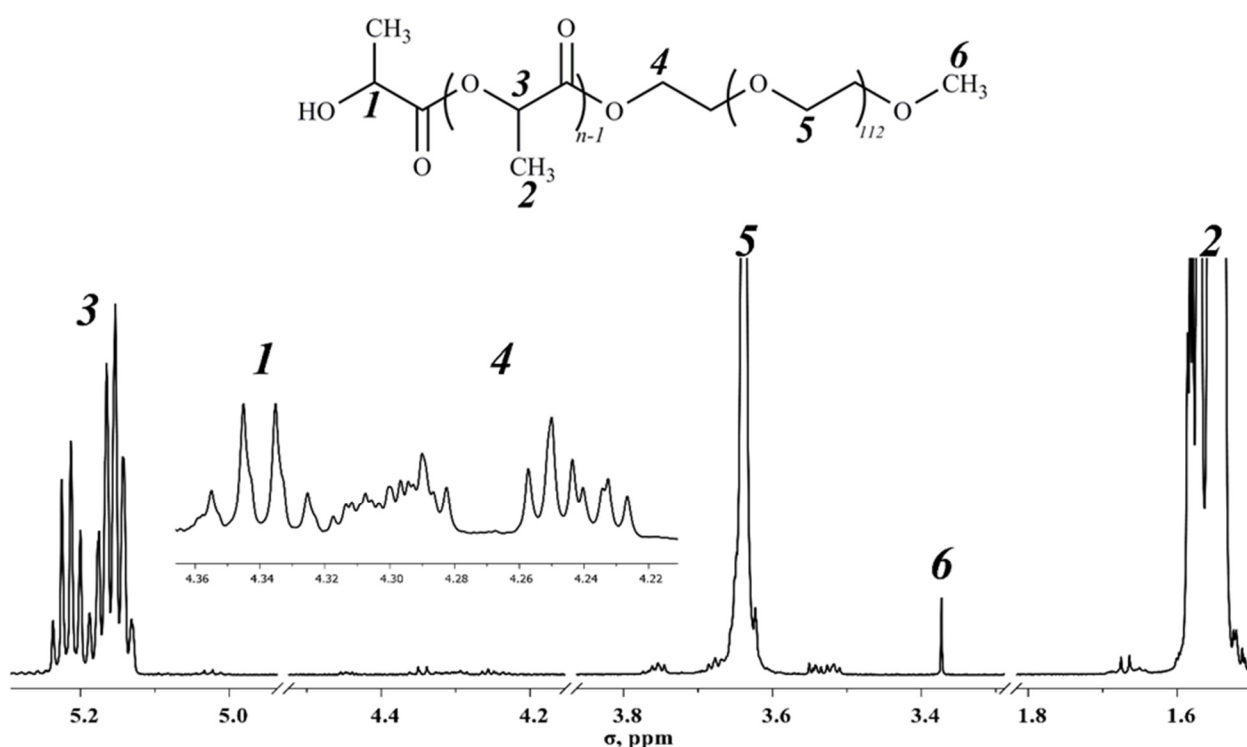

Figure S1. Representative <sup>1</sup>H NMR spectrum of P(D,L)LA<sub>50</sub>-*b*-PEG<sub>113</sub> copolymer (CDCl<sub>3</sub>, 300 MHz).

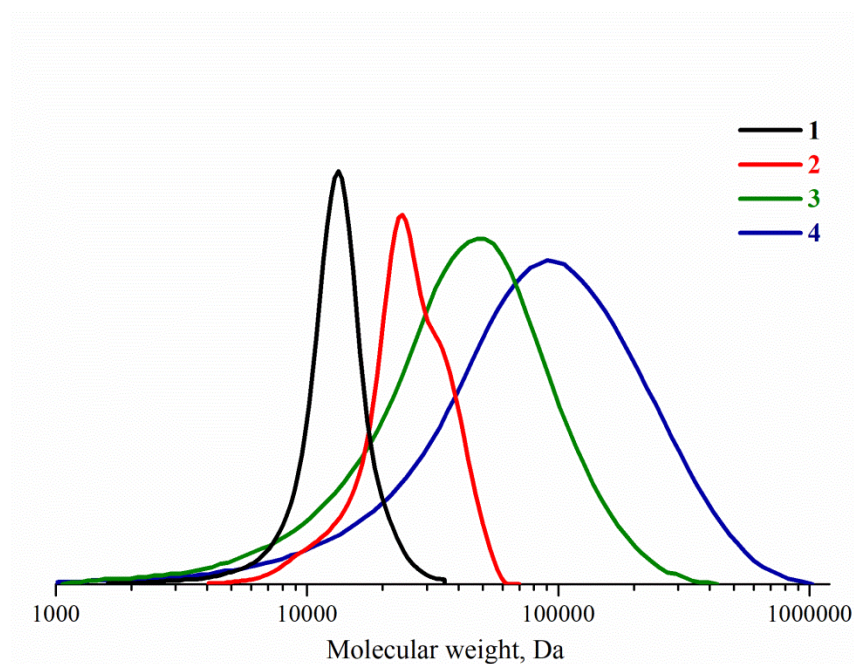

**Figure S2.** Chromatograms of the synthesized block copolymers: 1 – P(D,L)LA<sub>50</sub>-*b*-PEG<sub>113</sub>, 2 – P(D,L)LA<sub>180</sub>-*b*-PEG<sub>113</sub>, 3 – P(D,L)LA<sub>680</sub>-*b*-PEG<sub>113</sub>, 4 – P(D,L)LA<sub>1230</sub>-*b*-PEG<sub>113</sub>.

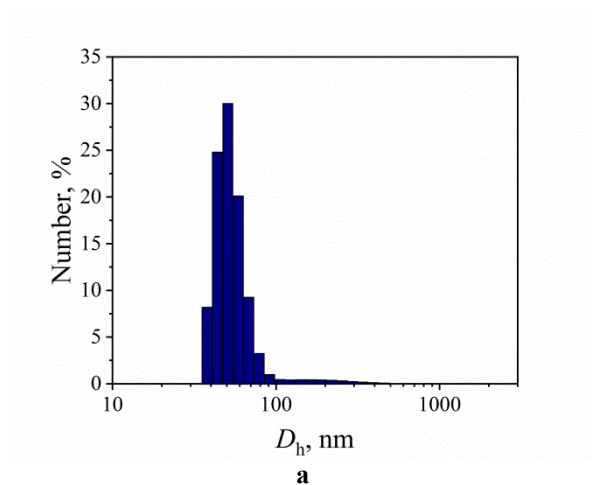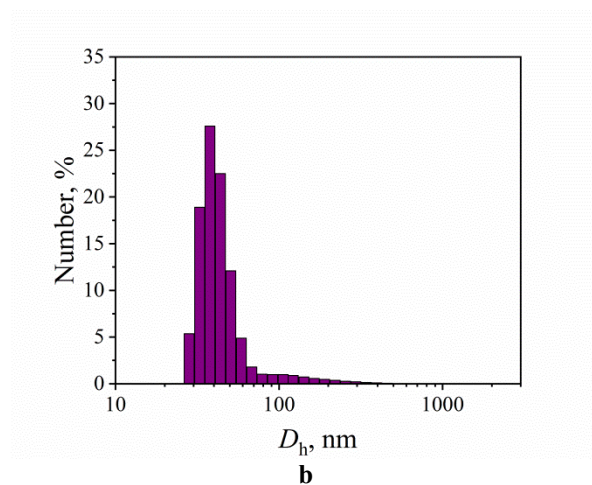

**Figure S3.** DLS number size distribution curves for diluted aqueous suspensions with concentration of 0.1 g/L based on (a) P(D,L)LA<sub>50</sub>-*b*-PEG<sub>113</sub> and (b) P(D,L)LA<sub>180</sub>-*b*-PEG<sub>113</sub> copolymers.

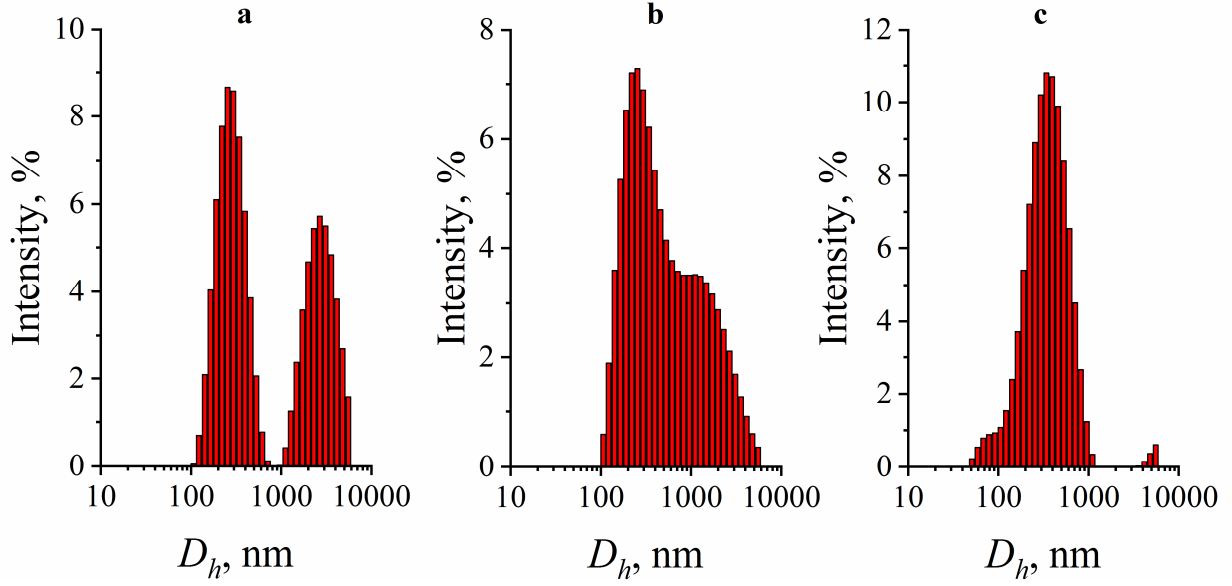

**Figure S4.** DLS intensity size distribution curves for aqueous suspensions of docetaxel-loaded P(D,L)LA<sub>1230</sub>-*b*-PEG<sub>113</sub> nanoparticles after freeze-drying with D(-)-mannitol and following reconstitution. The ratio of lyoprotectant:NPs was (a) 1:4, (b) 1:1 and (c) 2.5:1.

**Evaluation of parameters of P(D,L)LA<sub>n</sub>-*b*-PEG<sub>113</sub> nanoparticles.** The values of core-corona interface area ( $s_{int}$ ) of the P(D,L)LA<sub>n</sub>-*b*-PEG<sub>113</sub> nanoparticles (NPs) were calculated from the diameter of poly(D,L-lactide) P(D,L)LA core ( $D$ ) evaluated from TEM according to the following equation:

$$s_{int} = \frac{3}{\rho \cdot (D/2)},$$

where  $\rho = 1.25 \text{ g/cm}^3$  is the bulk density of PLA.

The values of tethering density of hydrophilic PEG chains ( $\sigma$ ) on the P(D,L)LA core surface of the P(D,L)LA<sub>n</sub>-*b*-PEG<sub>113</sub> NPs were calculated according to the equation:

$$\sigma = \frac{1}{s_{int}} = \frac{N_{agg}}{4\pi(D/2)^2},$$

where  $s_{int}$  is the P(D,L)LA core area corresponding to one PEG chain,  $N_{agg}$  is the aggregation number of NP.

The values of  $N_{agg}$  of the P(D,L)LA<sub>n</sub>-*b*-PEG<sub>113</sub> NPs were calculated according to the following equation:

$$N_{agg} = \frac{(D/2)^3 4\pi N_A \rho}{3M_0 N_{P(D,L)LA} 10^{-21}},$$

where  $N_A$  is the Avogadro constant,  $M_0$  is the molecular weight of lactide monomer unit,  $N_{P(D,L)LA}$  is the polymerization degree of the P(D,L)LA block.
